# Supplementary material for: Highly active and spherical natured mesoporous aluminosilicate nanoparticles materialized for t-butylation of phenol
Source: Royal Society of Chemistry journal article supplement (doi:10.1039/c6ra09745f), 2016-01-01
Supplement: c6ra09745f1.pdf [file c6ra09745f1.pdf]

**Table S1:** The acid sites of AISMSN catalysts

| Catalysts                 | Acid sites (mmol/g)          |                 |                  |                |               |
|---------------------------|------------------------------|-----------------|------------------|----------------|---------------|
|                           | $n_{Si}/n_{Al}$ <sup>a</sup> | Weak (393-623K) | Medium (623-723) | Strong (>723K) | Total (>623K) |
| AISMSN(AIC)               | 46                           | 0.553           | 0.071            | 0.223          | 0.294         |
| AISMSN(AIS)               | 43                           | 0.575           | 0.075            | 0.229          | 0.304         |
| AISMSN(AIN)               | 41                           | 0.596           | 0.080            | 0.230          | 0.310         |
| AISMSN(AIP)               | 42                           | 0.588           | 0.078            | 0.231          | 0.309         |
| AISMSN(20)                | 24                           | 0.747           | 0.097            | 0.296          | 0.393         |
| AISMSN(100)               | 101                          | 0.534           | 0.057            | 0.164          | 0.221         |
| W-AISMSN(20) <sup>b</sup> | 25                           | 0.744           | 0.097            | 0.295          | 0.392         |

<sup>a</sup>  $n_{Si}/n_{Al}$  ratios of products are determined by ICP-AES

<sup>b</sup> The catalyst was washed using ammonium chloride solution for the removal of non-framework octahedral aluminum species

**Table S2:** Comparison of the catalytic activity of *tert*-butylation of phenol over W-AISMSN(20) with other mesoporous catalysts (Time-on stream = 1 h).

| Reaction conditions/product details  | W-AISMSN(20)<br>(our work) | GaSBA-1(17)<br>(Ref. 22) | FeAlMCM-41 (20)<br>(Ref. 22) | AlMCM-41 (56)<br>(Ref.21) | FeMCM-41 (50)<br>(Ref.21) | FeSBA-1(36)<br>(Ref.22) |
|--------------------------------------|----------------------------|--------------------------|------------------------------|---------------------------|---------------------------|-------------------------|
| Weight of catalyst /mg               | 500                        | 500                      | 500                          | 750                       | 750                       | 500                     |
| $N_{BuOH}/n_{phenol}$                | 2                          | 3                        | 3                            | 2                         | 2                         | 3                       |
| WHSV ( $h^{-1}$ )                    | 4.86                       | 5.1                      | 5.1                          | 4.8                       | 4.8                       | 4.9                     |
| reaction temperature ( $^{\circ}C$ ) | 450K                       | 448                      | 473                          | 448                       | 448                       | 473                     |
| Phenol conversion (%)                | 90.4                       | 84.0                     | 70.1                         | 35.9                      | 21.1                      | 78.5                    |
| 2-TBP selectivity (%)                | 3.0                        | 7.4                      | 10.4                         | 8.1                       | 9.5                       | 14.3                    |
| 3-TBP selectivity (%)                | 5.8                        | -                        | -                            | 4.7                       | -                         | -                       |
| 4-TBP selectivity (%)                | 95.4                       | 72.1                     | 75.2                         | 83.4                      | 87                        | 71.2                    |
| 2,4-TBP selectivity (%)              | 1.6                        | 20.5                     | 14.4                         | 3.9                       | 3.5                       | 11.4                    |
